# Supplementary material for: Group sparse canonical correlation analysis for genomic data integration
Source: PubMed Central journal article supplement (PMC3751310; doi:10.1186/1471-2105-14-245), 2013-08-12
Supplement: 1471-2105-14-245-S1.pdf [file 1471-2105-14-245-S1.pdf]

Additional file 2: The ROC curves for correlated variables detection by CCA-11, CCA-group and CCA-sparse group methods.

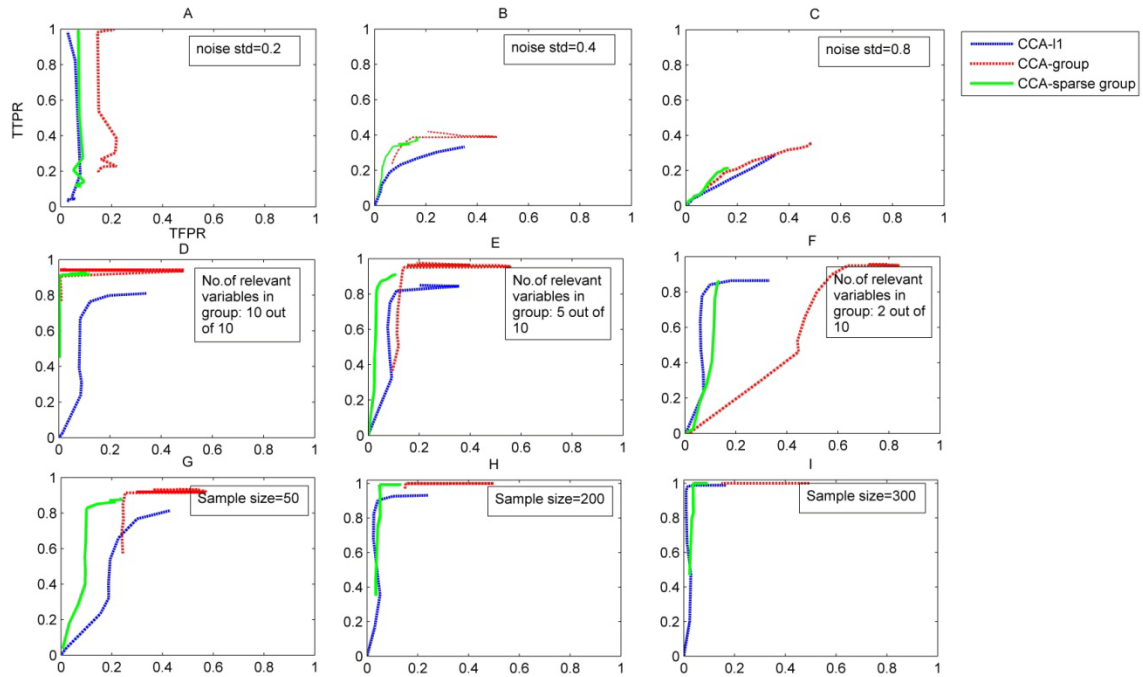

A-C: The comparison of three methods when simulating the noise variables with different standard deviation: noise std=0.2,0.4 and 0.8.

D-F: the comparison of methods by changing the number of correlated variables in the group.

G-I: the comparison of methods under different sample size(50,200,300).
